# Supplementary material for: Platelet-derived lysophosphatidic acid mediated LPAR1 activation as a therapeutic target for osteosarcoma metastasis
Source: PubMed Central journal article supplement (PMC8429042; doi:10.1038/s41388-021-01956-6), 2021-07-23
Supplement: 41388_2021_1956_MOESM2_ESM.pdf [file 41388_2021_1956_MOESM2_ESM.pdf]

**Platelet-derived lysophosphatidic acid mediated LPAR1 activation  
as a therapeutic target for osteosarcoma metastasis**

**Supplemental Materials and Methods**

**Quantitative real-time polymerase chain reaction**

Quantitative real-time polymerase chain reaction (qPCR) was performed using FastStart Essential DNA Green Master (Roche) and Light Cycler 96 (Roche) by the  $\Delta\Delta C_t$  method normalized to the 18S ribosomal RNA (rRNA) expression. Primer pairs used in qRT-PCR were as follows: human *LPAR1* forward, 5'-AATCGGGATACCATGATGAGTCTT-3'; human *LPAR1* reverse, 5'-CCAGGAGTCCAGCAGATGATAAA-3'; human *18S rRNA* forward, 5'-CTACCACATCCAAGGAAGCA-3'; human *18S rRNA* reverse, 5'-TTTTTCGTCACTACCTCCCCG-3'. Complementary DNAs were prepared with the Transcriptor First Strand cDNA Synthesis Kit (Roche) according to the manufacturer's protocols.

**Immunoblot analysis**

Cells were harvested using a cell scraper and lysed in lysis buffer [10 mM Tris-HCl (pH 7.4), 10 mM EDTA, 100 mM DTT, 1% Triton X-100] containing the cOmplete EDTA-free protease inhibitor cocktail (Roche) and PhosSTOP phosphatase inhibitor cocktail (Roche). The lysate was sonicated for 10–15 min on ice. The protein concentration was measured using the Pierce™ BCA Protein Assay Kit (Thermo Fisher) after centrifugation at 20,000 × g for 10 min. Equal amounts of cell lysates were electrophoresed in sodium dodecyl sulfate-polyacrylamide gel without boiling. The proteins were transferred to polyvinylidene difluoride membranes and immunoblotted with anti-human LPAR1 (#ab23698, abcam, 1:500) and  $\beta$ -actin (#A5441, Sigma, 1:5,000) Abs. The SuperSignal West Femto Maximum Sensitivity Substrate (Thermo Fisher) and the Amersham Imager 600 (Amersham) were used for the detection. The siRNAs targeting human LPAR1 (#LQ-003656-00-0010) and their control were purchased from the Dharmacon. Transfection of siRNAs was performed with the Lipofectamine RNAiMAX Reagent (Thermo Fisher Scientific) according to the manufacture's protocol.

## **Immunofluorescence**

Cells were cultured on the glass bottom dishes for 3 days. After overnight serum starvation, the cells were treated with/without 10 nM LPA for 4 h, fixed with 4% paraformaldehyde phosphate buffer solution (Wako) for 15 min, permeabilized with 0.1% Triton X-100 in PBS for 10 min, and blocked with 2% BSA in PBS for 30 min. Samples were incubated with an anti-phospho-Akt mAb (Ser473, #4060, CST, 1:1,000) and rhodamine-phalloidin reagent (Cytoskeleton) for 60 min, at 37°C. The bound antibody was detected with the Alexa 488-conjugated anti-rabbit IgG (Thermo Fisher Science). The samples were then washed with PBS and incubated with Hoechst33258 (1 µg/mL) for 5 minutes. Images were acquired using the IX71 microscope (Olympus).

### ***In vitro* proliferation assays**

Cell viability was assessed by the CellTiter-Glo Reagent (Promega) according to the manufacture's protocol. Briefly, osteosarcoma cells were seeded in a 96-well plate at a concentration of  $1 \times 10^3$  cells/100 µL with a range of Ki16425 doses for 72 h. Subsequently, CellTiter-Glo Reagent was treated to the cells and the luminescence was measured with the Mithras LB 940 Multimode Microplate Reader (Berthold, Germany).

### **Plasmid construction and CRISPR/Cas9 knockout of human LPAR1**

Human *LPAR1* targeting sgRNA was designed using a web tool created by the Broad Institute of MIT and Harvard (<http://crispr.mit.edu/>) as follows: sgRNA targeting human LPAR1#1: TTATTACCTAATGGCTAATC, #2: TGTTTGTATCTTCATCATGT, #3: ATGGAACACAGTCAGCAAGC, and a scramble sequence. Annealed sgRNA was digested by the BsmBI restriction enzyme and cloned into the pSpCas9(BB)-2A-Puro (PX459) V2.0 plasmid (Addgene). Plasmid transfection was performed with Lipofectamine 3000 reagent (Thermo Fisher Scientific) according to the manufacturer's protocol. The plasmid pHIV-AKALuc-ZsGreen was created using the pHIV-Luc-ZsGreen (Addgene, #39196) and pcDNA3 Venus-Akaluc (provided by the RIKEN BRC through the National BioResource Project of the MEXT/AMED, Japan), and used for the lentivirus production in 293FT cells according to the manufacturer's protocol.

### **Supplemental Video Legend**

MG-63 and HuO9 cells were seeded in 35 mm dish (Iwaki) at a concentration of 0.5 or  $2 \times 10^4$  cells/mL and cultured for 48 h. After cell attachment, the culture medium was exchanged for serum-free medium overnight. Starved cells were treated with 100 nM LPA or PBS for 4 h. Morphological changes were observed by the BZ-X800 (Keyence) under 5% CO<sub>2</sub>, at 37°C. Images were taken at 5 min intervals. Scale bars represent 100  $\mu$ m.

Supplemental Video 1: MG-63 cells treated with 100 nM LPA

Supplemental Video 2: MG-63 cells treated with PBS

Supplemental Video 3: HuO9 cells treated with 100 nM LPA

Supplemental Video 4: HuO9 cells treated with PBS
